# Supplementary material
Source: PubMed Central journal article supplement (PMC3374306)
Supplement: supp_111.137950_TableS2.pdf [file supp_111.137950_TableS2.pdf]

**Table S2 Sequences of primers used in this study**

| Primer     | Sequence 5' to 3'       | Probe      | Position <sup>A</sup> |
|------------|-------------------------|------------|-----------------------|
| TelomereF  | TTAGGGTTAGGGTTAGGG      | Telomere   | n/a                   |
| TelomereR  | CCCTAACCCCTAACCC        | Telomere   | n/a                   |
| MoTeR1001F | TCCCGGCCAATAGACGAA      | MoTER1 RT  | 2591-2574             |
| MoTeR1001R | CGTTAAAAGACCAGCAGCAGAC  | MoTER1 RT  | 2036-2055             |
| MoTER1002R | AGGGACGTTACCTATTACG     | MoTER1(3') | 4685-4667             |
| MoTER1002F | TAACGCCAATACAACCACC     | MoTER1(3') | 4215-4234             |
| MoTeR2002R | TTGGTTAACCCCTGAGGATAGAA | MoTER2     | 1485-1464             |
| MoTeR2002F | AATATTAACGCCGCCGTC      | MoTER2     | 1030-1047             |

<sup>A</sup> Position within the respective MoTeR sequences.
