# Supplementary material
Source: PubMed Central journal article supplement (PMC3374306)
Supplement: supp_111.137950_TableS3.pdf [file supp_111.137950_TableS3.pdf]

**Table S3 Protein sequences used in the phylogenetic analysis of MoTeR1**

| Name      | Organism                       | Genbank Accession | Reference                                               | Pubmed ref |
|-----------|--------------------------------|-------------------|---------------------------------------------------------|------------|
| Bilbo     | <i>Drosophila subobscura</i>   | AAB92389.1        | (Blesa and Martinez-Sebastian 1997)                     | 9364772    |
| CR1       | <i>Gallus gallus</i>           | AAA49027.1        | (Burch <i>et al.</i> 1993)                              | 8396264    |
| Doc       | <i>Drosophila melanogaster</i> | CAA35587.1        | (O'hare <i>et al.</i> 1991)                             | 1705654    |
| F         | <i>Drosophila melanogaster</i> | AAA28508          | (Di Nocera and Casari 1987)                             | 2441397    |
| Jockey    | <i>Drosophila funebris</i>     | P21329            | (Mizrokhi and Mazo 1990)                                | 1701254    |
| Juan      | <i>Aedes aegypti</i>           | AAA29354.1        | (Mouches <i>et al.</i> 1992)                            | 1327974    |
| Lian      | <i>Aedes aegypti</i>           | AAB65093.1        | (Tu <i>et al.</i> 1998)                                 | 9656485    |
| MGR583    | <i>Magnaporthe grisea</i>      | AAB71689.1        | (Meyn <i>et al.</i> )<br>(Nishimura <i>et al.</i> 2000) | 10939262   |
| NeSL1(Cb) | <i>Caenorhabditis briggsae</i> | AAZ15238.1        | (Novikova and Blinov 2005)                              |            |
| NeSL1(Ce) | <i>Caenorhabditis elegans</i>  | T25782            | (Bradshaw 1996)                                         |            |
| NLR1      | <i>Chironomus thummi</i>       | AAB26437.2        | (Blinov <i>et al.</i> 1993)                             | 8387152    |
| Q         | <i>Anopheles gambiae</i>       | AAA53489.1        | (Besansky <i>et al.</i> 1994)                           | 8069416    |
| R1(Bm)    | <i>Bombyx mori</i>             | AAC13649.1        | (Xiong and Eickbush 1988)                               | 2447482    |
| R1(Dm)    | <i>Drosophila melanogaster</i> | P16425.1          | (Jakubczak <i>et al.</i> 1990)                          | 1690812    |
| RT1       | <i>Anopheles gambiae</i>       | AAA29363          | (Besansky <i>et al.</i> 1992)                           | 1328871    |
| RT2       | <i>Anopheles gambiae</i>       | AAA29365.1        | (Besansky <i>et al.</i> 1992)                           | 1328871    |
| SART1     | <i>Bombyx mori</i>             | BAA19776.1        | (Takahashi <i>et al.</i> 1997)                          | 9092665    |
| SR1       | <i>Schistosoma mansoni</i>     | AAC06263.1        | (Drew and Brindley 1997)                                | 9190061    |
| Tad1      | <i>Neurospora crassa</i>       | AAA21792.1        | (Cambareri <i>et al.</i> 1994)                          | 7512193    |
| TAHRE     | <i>Drosophila melanogaster</i> | CAD65869.1        | (Abad <i>et al.</i> 2004)                               | 15175413   |
| TART-B1   | <i>Drosophila melanogaster</i> | T13173            | (Sheen and Levis 1994)                                  | 7809068    |
| TRAS      | <i>Bombyx mori</i>             | BAA07467.1        | (Okazaki <i>et al.</i> 1995)                            | 7623845    |
| Dong      | <i>Bombyx mori</i>             | AAA92147          | (Xiong and Eickbush 1993)                               | 8385316    |
| L1(clf)   | <i>Canis lupus familiaris</i>  | BAA25253.1        | (Choi <i>et al.</i> 1999)                               | 10050284   |

| Name          | Organism                                                       | Genbank Accession | Reference                        | Pubmed ref |
|---------------|----------------------------------------------------------------|-------------------|----------------------------------|------------|
| L1(h)         | <i>Homo sapiens</i>                                            | AAC51276.1        | (Sassaman <i>et al.</i> 1997)    | 9140393    |
| L1(mm)        | <i>Mus musculus</i>                                            | P11369.2          | (Loeb <i>et al.</i> 1986)        | 3023821    |
| R2(Bm)        | <i>Bombyx mori</i>                                             | T18197            | (Burke <i>et al.</i> 1987)       | 2439905    |
| R2(Dm)        | <i>Drosophila mercatorum</i>                                   | AAB94032.1        | (Malik and Eickbush 1999)        | 9927458    |
| R4            | <i>Ascaris lumbricoides</i>                                    | S60004            | (Burke <i>et al.</i> 1995)       | 8524653    |
| Swimmer [SW1] | <i>Oryzias latipes</i>                                         | AAD02928.1        | (Duvernell and Turner 1998)      | 9866212    |
| TX1           | <i>Xenopus laevis</i>                                          | P14381.1          | (Garrett <i>et al.</i> 1989)     | 2550791    |
| ZEPP          | <i>Chlorella vulgaris</i>                                      | BAA25763          | (Higashiyama <i>et al.</i> 1997) | 9218812    |
| Zorro1        | <i>Candida albicans</i> SC5314                                 | XP_710131.1       | (Jones <i>et al.</i> 2004)       | 15123810   |
| Zorro3        | <i>Candida albicans</i> SC5314                                 | XP_710326.1       | (Jones <i>et al.</i> 2004)       | 15123810   |
| Cnl1          | <i>Cryptococcus neoformans</i> var. <i>neoformans</i><br>JEC21 | XP_567259.1       | (Goodwin and Poulter 2001)       | 11427969   |
| CRE1          | <i>Crithidia fasciculata</i>                                   | AAA75435.2        | (Gabriel <i>et al.</i> 1990)     | 2153919    |
| CZAR          | <i>Trypanosoma cruzi</i>                                       | B41950            | (Villanueva <i>et al.</i> 1991)  | 1719380    |
| FoNLR9        | <i>Fusarium oxysporium</i>                                     | N/A               | (Novikova <i>et al.</i> 2009)    | 18677522   |
| Genie         | <i>Giardia intestinalis</i>                                    | AAL76330.1        | (Burke <i>et al.</i> 2002)       | 11961096   |
| GIIT          | <i>Giardia intestinalis</i>                                    | ABB04054.1        | (Prabhu <i>et al.</i> 2007)      | 17275000   |
| MoTER1        | <i>Magnaporthe oryzae</i>                                      | N/A               | Current Paper                    |            |
| SLACS1        | <i>Trypanosoma brucei</i>                                      | XP_827644.1       | (Berriman <i>et al.</i> 2005)    | 16020726   |
| Colg2         | mitochondrion <i>Podospora anserine</i>                        | CAA38781.1        | (Cummings <i>et al.</i> 1985)    | 2997455    |
| CoxI          | mitochondrion <i>Marchantia polymorpha</i>                     | AAC09454.1        | (Oda <i>et al.</i> 1992)         | 1731062    |
| Ec107         | <i>Escherichia coli</i>                                        | CAA44468.1        | (Herzer <i>et al.</i> 1992)      | 1372675    |
| ECO157        | <i>Escherichia coli</i> O157:H7 str. Sakai]                    | NP_052642.1       | (Makino <i>et al.</i> 1998)      | 9628576    |
| Mx162         | <i>Myxococcus xanthus</i>                                      | P23072.1          | (Inouye <i>et al.</i> 1989)      | 2465092    |
| Mx65          | <i>Myxococcus xanthus</i>                                      | P23071.1          | (Inouye <i>et al.</i> 1990)      | 1689062    |
| Pstso         | chloroplast <i>Scenedesmus obliquus</i>                        | P19593.1          | (Kuck 1989)                      | 2476655    |

| Name             | Organism                        | Genbank Accession | Reference                              | Pubmed ref |
|------------------|---------------------------------|-------------------|----------------------------------------|------------|
| RET(Ec)          | <i>Escherichia coli</i>         | CAA78293.1        | (Lim 1992)                             | 1282191    |
| RT67             | <i>Escherichia coli</i>         | P21325.1          | (Lampson <i>et al.</i> 1989)           | 2466332    |
| RT86             | <i>Escherichia coli</i>         | P23070.1          | (Lim and Maas 1989)                    | 2466573    |
| 1731             | <i>Drosophila melanogaster</i>  | S00954            | (Fourcade-Peronnet <i>et al.</i> 1988) | 2456522    |
| RETRO5           | <i>Magnaporthe oryzae</i>       | N\A               | (Dean <i>et al.</i> 2005)              | 15846337   |
| Ta1-2            | <i>Arabidopsis thaliana</i>     | CAA37920.1        | (Konieczny <i>et al.</i> 1991)         | 1709409    |
| TNT1             | <i>Nicotiana tabacum</i>        | P10978.1          | (Grandbastien <i>et al.</i> 1989)      | 2536143    |
| TY1              | <i>Saccharomyces cerevisiae</i> | P47100.3          | (Zagulski <i>et al.</i> 1995)          | 8619316    |
| Ty4              | <i>Saccharomyces cerevisiae</i> | P47024.2          | (Janetzky and Lehle 1992)              | 1328182    |
| Ty5              | <i>Saccharomyces paradoxus</i>  | AAC02631.1        | (Zou <i>et al.</i> 1995)               | 7846079    |
| Grasshopper [GH] | <i>Magnaporthe oryzae</i>       | AAA21442.1        | (Dobinson <i>et al.</i> 1993)          | 7679935    |
| MAGGY            | <i>Magnaporthe oryzae</i>       | AAA33420.1        | (Farman <i>et al.</i> 1996)            | 8757397    |
| MGLR3            | <i>Magnaporthe oryzae</i>       | AAK01619.1        | (Kang 2001)                            | 11277622   |
| Pyret2           | <i>Magnaporthe oryzae</i>       | XP_360100.2       | (Dean <i>et al.</i> 2005)              | 15846337   |
| RETRO61          | <i>Magnaporthe oryzae</i>       |                   | (Dean <i>et al.</i> 2005)              | 15846337   |
| RETRO71          | <i>Magnaporthe oryzae</i>       | N\A               | (Dean <i>et al.</i> 2005)              | 15846337   |
| Skippy           | <i>Fusarium oxysporum</i>       | S60179            | (Anaya and Roncero 1995)               | 8544829    |
| 17.6             | <i>Drosophila melanogaster</i>  | P04323.1          | (Saigo <i>et al.</i> 1984)             | 6209583    |
| 297              | <i>Drosophila melanogaster</i>  | P20825.1          | (Inouye <i>et al.</i> 1986)            | 2417839    |
| 412              | <i>Drosophila melanogaster</i>  | P10394.1          | (Yuki <i>et al.</i> 1986)              | 2426108    |
| Cinful           | <i>Zea mays</i>                 | AAD11615.1        | (Sanz-Alferez <i>et al.</i> 2003)      | 14608391   |
| Gypsy            | <i>Drosophila melanogaster</i>  | P10401.1          | (Marlor <i>et al.</i> 1986)            | 3023871    |
| RTSb             | <i>Sorghum bicolor</i>          | AAD27571.1        | (Llaca <i>et al.</i> 1998)             |            |
| TY3              | <i>Saccharomyces cerevisiae</i> | Q7LHG5.2          | (Hansen <i>et al.</i> 1988)            | 2854194    |
| BSV              | <i>Banana streak OL virus</i>   | NP_569150.1       | (Harper and Hull 1998)                 | 9926402    |

| Name     | Organism                                                   | Genbank Accession | Reference                       | Pubmed ref |
|----------|------------------------------------------------------------|-------------------|---------------------------------|------------|
| CSSV     | <i>Cacao swollen shoot virus</i>                           | NP_041734.1       | (Hagen <i>et al.</i> 1993)      | 7690503    |
| CsVMV    | <i>Cassava vein mosaic virus</i>                           | NP_056848.1       | (De Kochko <i>et al.</i> 1998)  | 9645200    |
| FMV      | <i>Figwort mosaic virus</i>                                | NP_619548.1       | (Richins <i>et al.</i> 1987)    | 3671088    |
| PCSV     | <i>Peanut chlorotic streak virus</i>                       | NP_042513.1       | (Richins 1993)                  |            |
| SVBV     | <i>Strawberry vein banding virus</i>                       | NP_043933.1       | (Petrzik <i>et al.</i> 1998)    | 9654684    |
| BFV      | <i>Bovine foamy virus</i>                                  | NP_044929.1       | (Renshaw and Casey 1994)        | 8289332    |
| FFV      | <i>Feline foamy virus</i>                                  | NP_056914.1       | (Bodem <i>et al.</i> 1998)      | 9601510    |
| SFV      | <i>Macaque simian foamy virus (SFVmac)</i>                 | YP_001961122.1    | (Kupiec <i>et al.</i> 1991)     | 1647358    |
| BaEV     | <i>Baboon endogenous virus strain M7</i>                   | P10272.1          | (Kato <i>et al.</i> 1987)       |            |
| BIV      | <i>Bovine immunodeficiency virus R29</i>                   | P19560.2          | (Garvey <i>et al.</i> 1990)     | 2183467    |
| BLV      | <i>Bovine leukemia virus</i>                               | P25059.1          | (Coulston <i>et al.</i> 1990)   | 2167927    |
| CAEV     | <i>Caprine arthritis encephalitis virus strain Cork</i>    | P33459.1          | (Saltarelli <i>et al.</i> 1990) | 2171210    |
| FIV      | <i>Feline immunodeficiency virus (isolate TM2)</i>         | P31822.1          | (Kiyomasu <i>et al.</i> 1991)   | 1649349    |
| HIV1     | <i>Human immunodeficiency virus type 1 (MAL ISOLATE)</i>   | P04588.3          | (Alizon <i>et al.</i> 1986)     | 2424612    |
| HTLV     | <i>Human T-cell lymphotropic virus type 1 (strain ATK)</i> | P03362.3          | (Seiki <i>et al.</i> 1983)      | 3021121    |
| JDV      | <i>Jembrana disease virus</i>                              | Q82851.1          | (Chadwick <i>et al.</i> 1995)   | 9049370    |
| MLV      | <i>AKR (endogenous) murine leukemia virus</i>              | P03356.2          | (Herr 1984)                     | 6319746    |
| RSV      | <i>Rous sarcoma virus - Prague C</i>                       | P03354.1          | (Schwartz <i>et al.</i> 1983)   | 6299578    |
| SRV      | <i>Simian retrovirus 1</i>                                 | P04025.1          | (Power <i>et al.</i> 1986)      | 3006247    |
| DHBV     | <i>Duck hepatitis B virus strain China</i>                 | P30028.1          | (Tong <i>et al.</i> 1990)       | 2235506    |
| HBV      | <i>Hepatitis B virus</i>                                   | NP_647604.2       | (Okamoto <i>et al.</i> 1986)    | 3783127    |
| WHV      | <i>Woodchuck hepatitis virus 59</i>                        | P12899.1          | (Cohen <i>et al.</i> 1988)      | 3336938    |
| TERT(At) | <i>Arabidopsis thaliana</i>                                | AAD54276.1        | (Fitzgerald <i>et al.</i> 1999) | 10611295   |

| Name         | Organism                                          | Genbank Accession | Reference                      | Pubmed ref |
|--------------|---------------------------------------------------|-------------------|--------------------------------|------------|
| TERT(GI)     | <i>Giardia lamblia</i> ATCC 50803                 | XP_001709571.1    | (Morrison <i>et al.</i> 2007)  | 17901334   |
| TERT(Hs)     | <i>Homo sapiens</i> (human)                       | NP_937983.2       | (Lingner <i>et al.</i> 1997)   | 9110970    |
| TERT(Mg)     | <i>Magnaporthe oryzae</i>                         | XP_363691.1       | (Dean <i>et al.</i> 2005)      | 15846337   |
| TERT(Sp)     | <i>Schizosaccharomyces pombe</i>                  | AAC49803.1        | (Nakamura <i>et al.</i> 1997)  | 9252327    |
| Athena(AvO)  | <i>Adineta vaga</i>                               | N/A               | (Gladyshev and Arkhipova 2007) | 17483479   |
| Athena(PrB)  | <i>Philodina roseola</i>                          | N/A               | (Gladyshev and Arkhipova 2007) | 17483479   |
| Cercyon      | <i>Schistosoma mansoni</i>                        | DAA00890.1        | (Arkhipova <i>et al.</i> 2003) | 12524543   |
| Coprina      | <i>Phanerochaete chrysosporium</i>                | AAX11377.1        | (Goodwin and Poulter)          |            |
| Neptune(Dr1) | <i>Danio rerio</i>                                | N/A               | (Gladyshev and Arkhipova 2007) | 17483479   |
| Neptune(Dr2) | <i>Danio rerio</i>                                | N/A               | (Gladyshev and Arkhipova 2007) | 17483479   |
| Penelope     | <i>Drosophila virilis</i>                         | AAA92124.2        | (Evgenev <i>et al.</i> 1997)   | 8990185    |
| Xena         | <i>Takifugu rubripes</i> ( <i>Fugu rubripes</i> ) | AAK58879.1        | (Nogare <i>et al.</i> 2002)    | 11861884   |

### References for sequences listed in Table S3

- Abad, J. P., B. De Pablos, K. Osoegawa, P. J. De Jong, A. Martin-Gallardo *et al.*, 2004 TAHRE, a novel telomeric retrotransposon from *Drosophila melanogaster*, reveals the origin of Drosophila telomeres. *Mol. Biol. Evol.* 21: 1620-1624.
- Alizon, M., S. Wainhobson, L. Montagnier, and P. Sonigo, 1986 Genetic-variability of the aids virus - nucleotide-sequence analysis of 2 isolates from African patients. *Cell* 46: 63-74.
- Anaya, N., and M. I. Roncero, 1995 Skippy, a retrotransposon from the fungal plant pathogen *Fusarium oxysporum*. *Mol. Gen. Genet.* 249: 637-647.
- Arkhipova, I. R., K. I. Pyatkov, M. Meselson, and M. B. Evgen'ev, 2003 Retroelements containing introns in diverse invertebrate taxa. *Nat. Genet.* 33: 123-124.
- Berriman, M., E. Ghedin, C. Hertz-Fowler, G. Blandin, H. Renauld *et al.*, 2005 The genome of the African trypanosome *Trypanosoma brucei*. *Science* 309: 416-422.
- Besansky, N. J., J. A. Bedell, and O. Mukabayire, 1994 Q: a new retrotransposon from the mosquito *Anopheles gambiae*. *Insect Mol Biol* 3: 49-56.
- Besansky, N. J., S. M. Paskewitz, D. M. Hamm, and F. H. Collins, 1992 Distinct families of site-specific retrotransposons occupy identical positions in the rRNA genes of *Anopheles gambiae*. *Mol Cell Biol* 12: 5102-5110.
- Blesa, D., and M. J. Martinez-Sebastian, 1997 bilbo, a non-LTR retrotransposon of *Drosophila subobscura*: a clue to the evolution of LINE-like elements in Drosophila. *Mol Biol Evol* 14: 1145-1153.
- Blinov, A. G., Y. V. Sobanov, S. S. Bogachev, A. P. Donchenko, and M. A. Filippova, 1993 The *Chironomus thummi* genome contains a non-LTR retrotransposon. *Mol Gen Genet* 237: 412-420.
- Bodem, J., M. Lochelt, H. Delius, and R. M. Flugel, 1998 Detection of subgenomic cDNAs and mapping of Feline Foamy Virus mRNAs reveals complex patterns of transcription. *Virology* 244: 417-426.
- Bradshaw, H., 1996 Direct submission T25782, pp.
- Burch, J. B., D. L. Davis, and N. B. Haas, 1993 Chicken repeat 1 elements contain a pol-like open reading frame and belong to the non-long terminal repeat class of retrotransposons. *Proc Natl Acad Sci U S A* 90: 8199-8203.
- Burke, W. D., C. C. Calalang, and T. H. Eickbush, 1987 The site-specific ribosomal insertion element type II of *Bombyx mori* (R2Bm) contains the coding sequence for a reverse transcriptase-like enzyme. *Mol Cell Biol* 7: 2221-2230.

- Burke, W. D., H. S. Malik, S. M. Rich, and T. H. Eickbush, 2002 Ancient lineages of non-LTR retrotransposons in the primitive eukaryote, *Giardia lamblia*. *Mol Biol Evol* 19: 619-630.
- Burke, W. D., F. Muller, and T. H. Eickbush, 1995 R4, a non-LTR retrotransposon specific to the large subunit rRNA genes of nematodes. *Nucleic Acids Res* 23: 4628-4634.
- Cambareri, E. B., J. Helber, and J. A. Kinsey, 1994 Tad1-1, an active LINE-like element of *Neurospora crassa*. *Mol Gen Genet* 242: 658-665.
- Chadwick, B. J., R. J. Coelen, G. E. Wilcox, L. M. Sammels, and G. Kertayadnya, 1995 Nucleotide sequence analysis of Jembrana Disease Virus - a bovine lentivirus associated with an acute disease syndrome. *J. Gen. Virol.* 76: 1637-1650.
- Choi, Y., N. Ishiguro, M. Shinagawa, C. J. Kim, Y. Okamoto *et al.*, 1999 Molecular structure of canine LINE-1 elements in canine transmissible venereal tumor. *Anim Genet* 30: 51-53.
- Cohen, J. I., R. H. Miller, B. Rosenblum, K. Denniston, J. L. Gerin *et al.*, 1988 Sequence comparison of Woodchuck Hepatitis Virus replicative forms shows conservation of the genome. *Virology* 162: 12-20.
- Coulston, J., H. Naif, R. Brandon, S. Kumar, S. Khan *et al.*, 1990 Molecular cloning and sequencing of an Australian isolate of proviral bovine leukemia virus DNA - comparison with other isolates. *J. Gen. Virol.* 71: 1737-1746.
- Cummings, D. J., I. A. Macneil, J. Domenico, and E. T. Matsuura, 1985 Excision-amplification of mitochondrial DNA during senescence in *Podospira anserina*. DNA sequence analysis of three unique "plasmids". *J Mol Biol* 185: 659-680.
- De Kochko, A., B. Verdaguer, N. Taylor, R. Carcamo, R. N. Beachy *et al.*, 1998 Cassava Vein Mosaic Virus (CsVMV), type species for a new genus of plant double stranded DNA viruses? *Arch Virol* 143: 945-962.
- Dean, R. A., N. J. Talbot, D. J. Ebbole, M. L. Farman, T. K. Mitchell *et al.*, 2005 The genome sequence of the rice blast fungus *Magnaporthe grisea*. *Nature* 434: 980-986.
- Di Nocera, P. P., and G. Casari, 1987 Related polypeptides are encoded by Drosophila F elements, I factors, and mammalian L1 sequences. *Proc. Natl. Acad. Sci. U S A* 84: 5843-5847.
- Dobinson, K. F., R. E. Harris, and J. E. Hamer, 1993 Grasshopper, a long terminal repeat (LTR) retroelement in the phytopathogenic fungus *Magnaporthe grisea*. *Mol Plant Microbe Interact* 6: 114-126.
- Drew, A. C., and P. J. Brindley, 1997 A retrotransposon of the non-long terminal repeat class from the human blood fluke *Schistosoma mansoni*. Similarities to the chicken-repeat-1-like elements of vertebrates. *Mol Biol Evol* 14: 602-610.

Duvernell, D. D., and B. J. Turner, 1998 Swimmer 1, a new low-copy-number LINE family in teleost genomes with sequence similarity to mammalian L1. *Mol Biol Evol* 15: 1791-1793.

Evgenov, M. B., H. Zelentsova, N. Shostak, M. Kozitsina, V. Barskyi *et al.*, 1997 Penelope, a new family of transposable elements and its possible role in hybrid dysgenesis in *Drosophila virilis*. *Proc Natl Acad Sci, USA* 94: 196-201.

Farman, M. L., Y. Tosa, N. Nitta, and S. A. Leong, 1996 MAGGY, a retrotransposon in the genome of the rice blast fungus *Magnaporthe grisea*. *Mol Gen Genet* 251: 665-674.

Fitzgerald, M. S., K. Riha, F. Gao, S. X. Ren, T. D. Mcknight *et al.*, 1999 Disruption of the telomerase catalytic subunit gene from Arabidopsis inactivates telomerase and leads to a slow loss of telomeric DNA. *Proc Natl Acad Sci, USA* 96: 14813-14818.

Fourcade-Peronnet, F., L. D'auriol, J. Becker, F. Galibert, and M. Best-Belpomme, 1988 Primary structure and functional organization of Drosophila 1731 retrotransposon. *Nucleic Acids Res* 16: 6113-6125.

Gabriel, A., T. J. Yen, D. C. Schwartz, C. L. Smith, J. D. Boeke *et al.*, 1990 A rapidly rearranging retrotransposon within the minixon gene locus of *Crithidia fasciculata*. *Mol Cell Biol* 10: 615-624.

Garrett, J. E., D. S. Knutzon, and D. Carroll, 1989 Composite transposable elements in the *Xenopus laevis* genome. *Mol Cell Biol* 9: 3018-3027.

Garvey, K. J., M. S. Oberste, J. E. Elser, M. J. Braun, and M. A. Gonda, 1990 Nucleotide sequence and genome organization of biologically active proviruses of the bovine immunodeficiency-like virus. *Virology* 175: 391-409.

Gladyshev, E. A., and I. R. Arkhipova, 2007 Telomere-associated endonuclease-deficient Penelope-like retroelements in diverse eukaryotes. *Proc Natl Acad Sci, USA* 104: 9352-9357.

Goodwin, T. J., and R. T. Poulter, Penelope-like retroelements in fungi, pp.

Goodwin, T. J., and R. T. Poulter, 2001 The diversity of retrotransposons in the yeast *Cryptococcus neoformans*. *Yeast* 18: 865-880.

Grandbastien, M. A., A. Spielmann, and M. Caboche, 1989 Tnt1, a mobile retroviral-like transposable element of tobacco isolated by plant cell genetics. *Nature* 337: 376-380.

Hagen, L. S., M. Jacquemond, A. Lepingle, H. Lot, and M. Tepfer, 1993 Nucleotide sequence and genomic organization of Cacao Swollen Shoot Virus. *Virology* 196: 619-628.

Hansen, L. J., D. L. Chalker, and S. B. Sandmeyer, 1988 Ty3, a yeast retrotransposon associated with tRNA genes, has homology to animal retroviruses. *Mol Cell Biol* 8: 5245-5256.



- Harper, G., and R. Hull, 1998 Cloning and sequence analysis of Banana Streak Virus DNA. *Virus Genes* 17: 271-278.
- Herr, W., 1984 Nucleotide sequence of AKV Murine Leukemia Virus. *J Virol* 49: 471-478.
- Herzer, P. J., S. Inouye, and M. Inouye, 1992 Retron-Ec107 is inserted into the *Escherichia coli* genome by replacing a palindromic 34bp intergenic sequence. *Mol Microbiol* 6: 345-354.
- Higashiyama, T., Y. Noutoshi, M. Fujie, and T. Yamada, 1997 Zepp, a LINE-like retrotransposon accumulated in the *Chlorella* telomeric region. *EMBO J* 16: 3715-3723.
- Inouye, S., P. J. Herzer, and M. Inouye, 1990 Two independent retrons with highly diverse reverse transcriptases in *Myxococcus xanthus*. *Proc Natl Acad Sci U S A* 87: 942-945.
- Inouye, S., M. Y. Hsu, S. Eagle, and M. Inouye, 1989 Reverse transcriptase associated with the biosynthesis of the branched RNA-linked msDNA in *Myxococcus xanthus*. *Cell* 56: 709-717.
- Inouye, S., S. Yuki, and K. Saigo, 1986 Complete nucleotide sequence and genome organization of a *Drosophila* transposable genetic element, 297. *Eur J Biochem* 154: 417-425.
- Jakubczak, J. L., Y. Xiong, and T. H. Eickbush, 1990 Type I (R1) and type II (R2) ribosomal DNA insertions of *Drosophila melanogaster* are retrotransposable elements closely related to those of *Bombyx mori*. *J Mol Biol* 212: 37-52.
- Janetzky, B., and L. Lehle, 1992 Ty4, a new retrotransposon from *Saccharomyces cerevisiae*, flanked by tau-elements. *J Biol Chem* 267: 19798-19805.
- Jones, T., N. A. Federspiel, H. Chibana, J. Dungan, S. Kalman *et al.*, 2004 The diploid genome sequence of *Candida albicans*. *Proc Natl Acad Sci U S A* 101: 7329-7334.
- Kang, S., 2001 Organization and distribution pattern of MGLR-3, a novel retrotransposon in the rice blast fungus *Magnaporthe grisea*. *Fungal Genet Biol* 32: 11-19.
- Kato, S., K. Matsuo, N. Nishimura, N. Takahashi, and T. Takano, 1987 The entire nucleotide sequence of Baboon Endogenous Virus DNA - a chimeric genome structure of murine type-C and simian type-D retroviruses. *Jap J Genet* 62: 127-137.
- Kiyomasu, T., T. Miyazawa, T. Furuya, R. Shibata, H. Sakai *et al.*, 1991 Identification of Feline Immunodeficiency Virus Rev gene activity. *J. Virol.* 65: 4539-4542.
- Konieczny, A., D. F. Voytas, M. P. Cummings, and F. M. Ausubel, 1991 A superfamily of *Arabidopsis thaliana* retrotransposons. *Genetics* 127: 801-809.

- Kuck, U., 1989 The intron of a plastid gene from a green alga contains an open reading frame for a reverse transcriptase-like enzyme. *Mol Gen Genet* 218: 257-265.
- Kupiec, J. J., A. Kay, M. Hayat, R. Ravier, J. Peries *et al.*, 1991 Sequence-Analysis of the Simian Foamy Virus Type-1 Genome. *Gene* 101: 185-194.
- Lampson, B. C., J. Sun, M. Y. Hsu, J. Vallejo-Ramirez, S. Inouye *et al.*, 1989 Reverse transcriptase in a clinical strain of *Escherichia coli*: production of branched RNA-linked msDNA. *Science* 243: 1033-1038.
- Lim, D., 1992 Structure and biosynthesis of unbranched multicopy single-stranded DNA by reverse transcriptase in a clinical *Escherichia coli* isolate. *Mol Microbiol* 6: 3531-3542.
- Lim, D., and W. K. Maas, 1989 Reverse transcriptase-dependent synthesis of a covalently linked, branched DNA-RNA compound in *E. coli* B. *Cell* 56: 891-904.
- Lingner, J., T. R. Hughes, A. Shevchenko, M. Mann, V. Lundblad *et al.*, 1997 Reverse transcriptase motifs in the catalytic subunit of telomerase. *Science* 276: 561-567.
- Llaca, V., A. Lou, S. Young, and J. Messing, 1998 Retrotransposable elements of *Sorghum bicolor*, pp. Waksman Institute, Rutgers University.
- Loeb, D. D., R. W. Padgett, S. C. Hardies, W. R. Shehee, M. B. Comer *et al.*, 1986 The sequence of a large L1Md element reveals a tandemly repeated 5' end and several features found in retrotransposons. *Mol Cell Biol* 6: 168-182.
- Makino, K., K. Ishii, T. Yasunaga, M. Hattori, K. Yokoyama *et al.*, 1998 Complete nucleotide sequences of 93-kb and 3.3-kb plasmids of an enterohemorrhagic *Escherichia coli* O157:H7 derived from Sakai outbreak. *DNA Res* 5: 1-9.
- Malik, H. S., and T. H. Eickbush, 1999 Retrotransposable elements R1 and R2 in the rDNA units of *Drosophila mercatorum*: abnormal abdomen revisited. *Genetics* 151: 653-665.
- Marlor, R. L., S. M. Parkhurst, and V. G. Corces, 1986 The *Drosophila melanogaster* gypsy transposable element encodes putative gene products homologous to retroviral proteins. *Mol Cell Biol* 6: 1129-1134.
- Meyn, M. A., L. Farral, B. Valent, F. G. Chumley, and M. J. Orbach, Magnaporthe grisea repeated DNA element MGR583 is a member of the LINE-1 class of polyA retrotransposons, pp.
- Mizrokhi, L. J., and A. M. Mazo, 1990 Evidence for horizontal transmission of the mobile element jockey between distant *Drosophila* species. *Proc Natl Acad Sci U S A* 87: 9216-9220.

- Morrison, H. G., A. G. McArthur, F. D. Gillin, S. B. Aley, R. D. Adam *et al.*, 2007 Genomic minimalism in the early diverging intestinal parasite *Giardia lamblia*. *Science* 317: 1921-1926.
- Mouches, C., N. Bensaadi, and J. C. Salvado, 1992 Characterization of a LINE retroposon dispersed in the genome of three non-sibling *Aedes* mosquito species. *Gene* 120: 183-190.
- Nakamura, T. M., G. B. Morin, K. B. Chapman, S. L. Weinrich, W. H. Andrews *et al.*, 1997 Telomerase catalytic subunit homologs from fission yeast and human. *Science* 277: 955-959.
- Nishimura, M., N. Hayashi, N. S. Jwa, G. W. Lau, J. E. Hamer *et al.*, 2000 Insertion of the LINE retrotransposon MGL causes a conidiophore pattern mutation in *Magnaporthe grisea*. *Mol Plant Microbe Interact* 13: 892-894.
- Nogare, D. E. D., M. S. Clark, G. Elgar, I. G. Frame, and R. T. M. Poulter, 2002 Xena, a full-length basal retroelement from tetraodontid fish. *Mol. Biol. Evol.* 19: 247-255.
- Novikova, O., and A. Blinov, 2005 NeSL-1 like element from *Caenorhabditis briggsae*, pp. Institute of Cytology and Genetics.
- Novikova, O., V. Fet, and A. Blinov, 2009 Non-LTR retrotransposons in fungi. *Functional & Integrative Genomics* 9: 27-42.
- O'hare, K., M. R. Alley, T. E. Cullingford, A. Driver, and M. J. Sanderson, 1991 DNA sequence of the Doc retroposon in the white-one mutant of *Drosophila melanogaster* and of secondary insertions in the phenotypically altered derivatives white-honey and white-eosin. *Mol Gen Genet* 225: 17-24.
- Oda, K., K. Yamato, E. Ohta, Y. Nakamura, M. Takemura *et al.*, 1992 Gene organization deduced from the complete sequence of liverwort *Marchantia polymorpha* mitochondrial DNA. A primitive form of plant mitochondrial genome. *J Mol Biol* 223: 1-7.
- Okamoto, H., M. Imai, M. Shimozaki, Y. Hoshi, H. Iizuka *et al.*, 1986 Nucleotide sequence of a cloned hepatitis B virus genome, subtype ayr: comparison with genomes of the other three subtypes. *J Gen Virol* 67 ( Pt 11): 2305-2314.
- Okazaki, S., H. Ishikawa, and H. Fujiwara, 1995 Structural analysis of TRAS1, a novel family of telomeric repeat-associated retrotransposons in the silkworm, *Bombyx mori*. *Mol Cell Biol* 15: 4545-4552.
- Petrzik, K., V. Benes, I. Mraz, J. Honetslegrova-Franova, W. Ansorge *et al.*, 1998 Strawberry Vein Banding Virus--definitive member of the genus Caulimovirus. *Virus Genes* 16: 303-305.
- Power, M. D., P. A. Marx, M. L. Bryant, M. B. Gardner, P. J. Barr *et al.*, 1986 Nucleotide sequence of Srv-1, a type-D Simian Acquired Immune Deficiency Syndrome retrovirus. *Science* 231: 1567-1572.

- Prabhu, A., H. G. Morrison, C. R. Martinez, 3rd, and R. D. Adam, 2007 Characterisation of the subtelomeric regions of *Giardia lamblia* genome isolate WBC6. *Int J Parasitol* 37: 503-513.
- Renshaw, R. W., and J. W. Casey, 1994 Transcriptional mapping of the 3' end of the Bovine Syncytial Virus genome. *J. Virol.* 68: 1021-1028.
- Richins, R. D., 1993 Organization and expression of the peanut chlorotic streak virus genome, pp. University of Kentucky, Lexington.
- Richins, R. D., H. B. Scholthof, and R. J. Shepherd, 1987 Sequence of Figwort Mosaic Virus DNA (caulimovirus group). *Nucleic Acids Res* 15: 8451-8466.
- Saigo, K., W. Kugimiya, Y. Matsuo, S. Inouye, K. Yoshioka *et al.*, 1984 Identification of the coding sequence for a reverse transcriptase-like enzyme in a transposable genetic element in *Drosophila melanogaster*. *Nature* 312: 659-661.
- Saltarelli, M., G. Querat, D. a. M. Konings, R. Vigne, and J. E. Clements, 1990 Nucleotide sequence and transcriptional analysis of molecular clones of CAEV which generate infectious virus. *Virology* 179: 347-364.
- Sanz-Alferez, S., P. Sanmiguel, Y. K. Jin, P. S. Springer, and J. L. Bennetzen, 2003 Structure and evolution of the Cinfu retrotransposon family of maize. *Genome* 46: 745-752.
- Sassaman, D. M., B. A. Dombroski, J. V. Moran, M. L. Kimberland, T. P. Naas *et al.*, 1997 Many human L1 elements are capable of retrotransposition. *Nat Genet* 16: 37-43.
- Schwartz, D. E., R. Tizard, and W. Gilbert, 1983 Nucleotide sequence of Rous Sarcoma Virus. *Cell* 32: 853-869.
- Seiki, M., S. Hattori, Y. Hirayama, and M. Yoshida, 1983 Human adult T-Cell Leukemia Virus - complete nucleotide sequence of the provirus genome integrated in leukemia cell DNA. *Proc Natl Acad Sci, USA* 80: 3618-3622.
- Sheen, F. M., and R. W. Levis, 1994 Transposition of the LINE-like retrotransposon TART to *Drosophila* chromosome termini. *Proc Natl Acad Sci U S A* 91: 12510-12514.
- Takahashi, H., S. Okazaki, and H. Fujiwara, 1997 A new family of site-specific retrotransposons, SART1, is inserted into telomeric repeats of the silkworm, *Bombyx mori*. *Nucleic Acids Res* 25: 1578-1584.
- Tong, S., F. Mattes, K. Teubner, and H. E. Blum, 1990 Complete nucleotide sequence of a Chinese Duck Hepatitis B virus. *Nucleic Acids Res* 18: 6139.
- Tu, Z., J. Isoe, and J. A. Guzova, 1998 Structural, genomic, and phylogenetic analysis of Lian, a novel family of non-LTR retrotransposons in the yellow fever mosquito, *Aedes aegypti*. *Mol Biol Evol* 15: 837-853.

- Villanueva, M. S., S. P. Williams, C. B. Beard, F. F. Richards, and S. Aksoy, 1991 A new member of a family of site-specific retrotransposons is present in the spliced leader RNA genes of *Trypanosoma cruzi*. *Mol Cell Biol* 11: 6139-6148.
- Xiong, Y., and T. H. Eickbush, 1988 The site-specific ribosomal DNA insertion element R1Bm belongs to a class of non-long-terminal-repeat retrotransposons. *Mol Cell Biol* 8: 114-123.
- Xiong, Y., and T. H. Eickbush, 1993 Dong, a non-long terminal repeat (non-LTR) retrotransposable element from *Bombyx mori*. *Nucleic Acids Res* 21: 1318.
- Yuki, S., S. Inouye, S. Ishimaru, and K. Saigo, 1986 Nucleotide sequence characterization of a *Drosophila* retrotransposon, 412. *Eur J Biochem* 158: 403-410.
- Zagulski, M., B. Babinska, R. Gromadka, A. Migdalski, J. Rytka *et al.*, 1995 The sequence of 24.3 kb from chromosome X reveals five complete open reading frames, all of which correspond to new genes, and a tandem insertion of a Ty1 transposon. *Yeast* 11: 1179-1186.
- Zou, S., D. A. Wright, and D. F. Voytas, 1995 The *Saccharomyces* Ty5 retrotransposon family is associated with origins of DNA replication at the telomeres and the silent mating locus HMR. *Proc Natl Acad Sci U S A* 92: 920-924.
