# Supplementary material
Source: PubMed Central journal article supplement (PMC3374306)
Supplement: supp_111.137950_TableS4.pdf [file supp_111.137950_TableS4.pdf]

**Table S4** *De novo* telomere changes following two generations of growth *in planta*.

| Isolate             | Spore number | Telomere changes | Isolate             | Spore number | Telomere changes |
|---------------------|--------------|------------------|---------------------|--------------|------------------|
| <b>70-15</b>        | 7G0-1        | -                | <b>LpKY97-1A</b>    | LpG0-1       | -                |
|                     | 7G2-1        | 0                |                     | LpG2-1       | 1                |
|                     | 7G2-2        | 0                |                     | LpG2-2       | 2                |
|                     | 7G2-3        | 0                |                     | LpG2-3       | 1                |
|                     | 7G2-4        | 0                |                     | LpG2-4       | 7                |
|                     | 7G2-5        | 1                |                     | LpG2-5       | 7                |
|                     | 7G2-6        | 0                |                     | LpG2-6       | 7                |
|                     | 7G2-7        | 0                |                     | LpG2-7       | 2                |
|                     | 7G2-8        | 0                |                     | LpG2-8       | 6                |
|                     | 7G2-9        | 0                |                     | LpG2-9       | 6                |
|                     | 7G2-11       | 0                |                     | LpG2-11      | 2                |
|                     | 7G2-12       | 0                |                     | LpG2-12      | 5                |
|                     | 7G2-13       | 0                |                     | LpG2-13      | 5                |
|                     | 7G2-14       | 0                |                     | LpG2-14      | 5                |
|                     | 7G2-15       | 0                |                     | LpG2-15      | 2                |
|                     | 7G2-16       | 0                |                     | LpG2-16      | 1                |
|                     | 7G2-17       | 0                |                     | LpG2-17      | 5                |
|                     | 7G2-18       | 0                |                     | LpG2-18      | 8                |
|                     | 7G2-19       | 0                |                     | LpG2-19      | 3                |
|                     | 7G2-20       | 0                |                     | LpG2-20      | 2                |
| Average per isolate |              | 0.05             | Average per isolate |              | 4.1              |
