# Supplementary material
Source: PubMed Central journal article supplement (PMC3374306)
Supplement: supp_111.137950_TableS5.pdf [file supp_111.137950_TableS5.pdf]

Table S5 Telomere rearrangements among single spore cultures of *M. oryzae* isolates from rice and perennial ryegrass.

| Strain                    | #Single Spores | # Novel Telomeres         |
|---------------------------|----------------|---------------------------|
| <b>rice</b>               |                |                           |
| 340-2                     | 9              | 1                         |
| IN17                      | 8              | 1                         |
| 91L5                      | 8              | 1                         |
| CD128                     | 8              | 2                         |
| ML33P6                    | 9              | 0                         |
| O-135                     | 8              | 1                         |
| O-219                     | 10             | 0                         |
| O-312                     | 10             | 1                         |
| O-314                     | 10             | 3                         |
| O-315                     | 10             | 0                         |
| 89L32                     | 10             | 1                         |
| 90T8                      | 10             | 0                         |
| 9234                      | 5              | 0                         |
| <b>average</b>            |                | <b>0.1 changes/spore</b>  |
| <b>perennial ryegrass</b> |                |                           |
| TFGGA                     | 18             | 8                         |
| PL1-1                     | 10             | 1                         |
| PRG331                    | 8              | 4                         |
| LES2                      | 10             | 7                         |
| LES3                      | 10             | 3                         |
| KS320                     | 8              | 1                         |
| O106                      | 2              | 3                         |
| O107                      | 2              | 3                         |
| LpOH1                     | 2              | 3                         |
| CPMD                      | 2              | 1                         |
| <b>average</b>            |                | <b>0.47 changes/spore</b> |
