# Supplementary material
Source: PubMed Central journal article supplement (PMC3374306)
Supplement: supp_111.137950_TableS6.pdf [file supp_111.137950_TableS6.pdf]

**Table S6 Tandem repeats within the MoTeRs**

| Repeat                   | Consensus Sequence of Repeat Unit                                                                                                                                                                                                                                         | Length | Location  | Copies |
|--------------------------|---------------------------------------------------------------------------------------------------------------------------------------------------------------------------------------------------------------------------------------------------------------------------|--------|-----------|--------|
| <b>MoTeR1 and MoTeR2</b> |                                                                                                                                                                                                                                                                           |        |           |        |
| A                        | CCCGAA                                                                                                                                                                                                                                                                    | 6      | 1-12      | 2      |
| B                        | CCCAA                                                                                                                                                                                                                                                                     | 6      | 13-63     | 8      |
| C                        | <u>GGGGCTATTTATGCGCTTTAATTTGTGC</u> <sup>A</sup>                                                                                                                                                                                                                          | 28     | 477-553   | 2.8    |
| D                        | <u>TATTT(ATGCGCTTTAATT)TGAGCGGGGC</u><br>TATTA(ATGCGCTTTAATT)TACAAATT <sup>B</sup>                                                                                                                                                                                        | 55     | 510-636   | 2.3    |
| E                        | ATTGCTATTATTATCGTTACTATTATTATT                                                                                                                                                                                                                                            | 30     | 668-724   | 1.9    |
| F                        | TTTCGTAGGCTTTGC                                                                                                                                                                                                                                                           | 15     | 794-852   | 3.9    |
| <b>MoTeR1-specific</b>   |                                                                                                                                                                                                                                                                           |        |           |        |
| G                        | <u>TTTACCTGTTTTATT</u> AGCGGTTTACCTGCTTTTATTACCTGGTTCCCC                                                                                                                                                                                                                  | 48     | 909-1174  | 2.6    |
| H                        | GTTTTTACTAGCAGTTAAATTTACCTTTTTAAGGTTA <u>TTTACCTGCTTTTATT</u> CAC<br>AGGGCACCCCT                                                                                                                                                                                          | 67     | 1203-1389 | 3      |
| I                        | ATAACCCAGGGTTA                                                                                                                                                                                                                                                            | 15     | 1904-1953 | 3.3    |
| J                        | TTTTTG                                                                                                                                                                                                                                                                    | 6      | 4690-4832 | 23.8   |
| K                        | TTTTTTC                                                                                                                                                                                                                                                                   | 7      | 4916-4941 | 3.7    |
| <b>MoTeR2-specific</b>   |                                                                                                                                                                                                                                                                           |        |           |        |
| L                        | CGCCAAAAGTCCAGTATATATATCGATTAAATTCGAATTTGAATTGGTTAAC<br>CCCCTGTATATTAATTTGGCTGAAAAATCCTGGAATATACGTGCCTTTTTAAAA<br>CAACTTTTTGCCGTCCCTATCCAGATAACATGGTTTTTTAGCAATGTTTCTATCC<br>TCAGGGTTACCAATTTTATATTTGGTATTTATTCGATTTATTATTGGATTTTA<br>ACCCCGATTTTCGACCGACTATTATCGATTTATTA | 253    | 1072-1539 | 1.9    |
| M                        | TATTTATTCGATT                                                                                                                                                                                                                                                             | 13     | 1251-1277 | 2.1    |
| N                        | ATTGGATTAATCCGCTAAATAA                                                                                                                                                                                                                                                    | 22     | 1522-1578 | 2.6    |
| O                        | TTTTTCTTTTC                                                                                                                                                                                                                                                               | 13     | 1618-1642 | 1.9    |

<sup>A</sup> Sequence motifs that are present in two different tandem repeats are underlined in the same style.

<sup>B</sup> Sequences in parentheses are duplicated within a single repeat unit.
