# Supplementary material
Source: PubMed Central journal article supplement (PMC3374306)
Supplement: supp_111.137950_TableS8.pdf [file supp_111.137950_TableS8.pdf]

**Table S8** Variability among MoTeR-MoTeR junctions in six different Magnaporthe strains.

| Junction Type           |    | Sequence (5' to 3') <sup>A</sup>                                                                                                                     | Isolate(s)    |
|-------------------------|----|------------------------------------------------------------------------------------------------------------------------------------------------------|---------------|
| M1/2 <sup>B</sup> to M2 | 1  | ...(CCCTAA) <sub>3</sub> [ <b>CCCAAA</b> ] <sub>11</sub> <b>CCCGAA</b> ...                                                                           | LPKY97-1A     |
|                         | 2  | ...(CCCTAA) <sub>2</sub> <b>CCCAAA</b> (CCCTAA)[ <b>CCCAAA</b> ] <sub>10</sub> <b>CCCGAA</b> ...                                                     | LPKY97-1A     |
|                         | 3  | ...(CCCTAA) <sub>3</sub> ( <b>CCCAAA</b> )(CCCTAA) <sub>2</sub> [ <b>CCCAAA</b> ] <sub>10</sub> <b>CCCGAA</b> ...                                    | LPKY97-1A     |
|                         | 4  | ...(CCCTAA) <sub>4</sub> <b>CCCAAA</b> (CCCTAA)[ <b>CCCAAA</b> ] <sub>10</sub> <b>CCCGAA</b> ...                                                     | LPKY97-1A     |
|                         | 5  | ...(CCCTAA) <sub>3</sub> <b>CCCAAA</b> (CCCTAA)[ <b>CCCAAA</b> ] <sub>10</sub> <b>CCCGAA</b> ...                                                     | LPKY97-1A     |
|                         | 6  | ...(CCCTAA)( <b>CCCGAA</b> ) <sub>2</sub> [ <b>CCCAAA</b> ] <sub>8</sub> <b>CCCGAA</b> ...                                                           | FH            |
|                         | 7  | ...(CCCTAA) <sub>2</sub> <u>TAATAAAGCGGAATTAATAA</u> ( <b>CCCGAA</b> ) <sub>2</sub> [ <b>CCCAAA</b> ] <sub>8</sub> <b>CCCGAA</b> ...                 | FH            |
|                         | 8  | ...(CCCTAA)[ <b>CCCAAA</b> ] <sub>8</sub> <b>CCCGAA</b> ...                                                                                          | FH            |
|                         | 9  | ...(CCCTAA)[ <b>CCCAAA</b> ] <sub>3</sub> <b>CCCGAA</b> ...                                                                                          | FH            |
|                         | 10 | ...(CCCTAA) <b>CCCGAA</b> [ <b>CCCAAA</b> ] <sub>6</sub> <b>CCCGAA</b> ...                                                                           | RGNJ          |
|                         | 11 | ... <b>CCCGAA</b> [ <b>CCCAAA</b> ] <sub>6</sub> <b>CCCGAA</b> ...                                                                                   | RGNJ          |
|                         | 12 | ...(CCCTAA)( <b>CCCGAA</b> )[ <b>CCCAAA</b> ] <sub>6</sub> <b>CCCGAA</b> ...                                                                         | RGNJ          |
|                         | 13 | ...(CCCTAA)[ <b>CCCAAA</b> ] <sub>6</sub> <b>CCCGAA</b> ...                                                                                          | RGNJ          |
|                         | 14 | ...(CCCTAA)CCC <u>GCAAATAAGCTTAGAATATAATAAAGCGGAATTAATAA</u> (CCCTAA) <sub>5</sub> ( <b>CCCGAA</b> )[ <b>CCCAAA</b> ] <sub>5</sub> <b>CCCGAA</b> ... | RGNJ          |
|                         | 15 | ...(CCCTAA)(CCCTAG)(CCCTAA) <sub>27</sub> ( <b>CCCGAA</b> )(CCCTAA)( <b>CCCGAA</b> )[ <b>CCCAAA</b> ] <sub>5</sub> <b>CCCGAA</b> ...                 | RGNJ          |
|                         | 16 | ...(CCCTAA) <sub>28</sub> ( <b>CCCGAA</b> )(CCCTAA)( <b>CCCGAA</b> )[ <b>CCCAAA</b> ] <sub>5</sub> <b>CCCGAA</b> ...                                 | RGNJ          |
|                         | 17 | ...(CCCTAA)(GCCAAA)[ <b>CCCAAA</b> ] <sub>5</sub> <b>CCCGAA</b> ...                                                                                  | RGNJ          |
|                         | 18 | ...(CCCTAA) <sub>18</sub> [ <b>CCCAAA</b> ] <sub>4</sub> <b>CCCGAA</b> ...                                                                           | RGNJ          |
|                         | 19 | ...(CCCTAA) <sub>5</sub> ( <b>CCCGAA</b> )[ <b>CCCAAA</b> ] <sub>4</sub> <b>CCCGAA</b> ...                                                           | RGNJ          |
|                         | 20 | ...(CCCTAA) <sub>28</sub> [ <b>CCCAAA</b> ] <sub>2</sub> <b>CCCGAA</b> ...                                                                           | PL1-1         |
|                         | 21 | ...(CCCTAA) <sub>3</sub> [ <b>CCCAAA</b> ] <sub>2</sub> <b>CCCGAA</b> ...                                                                            | PL1-1         |
|                         | 22 | ...(CCCTAA) <sub>3</sub> [ <b>CCCAAA</b> ] <sub>7</sub> <b>CCCGAA</b> ...                                                                            | LPKY97-1A, FH |
|                         | 23 | ...(CCCTAA) <sub>2</sub> [ <b>CCCGAA</b> ] <sub>2</sub> [ <b>CCCAAA</b> ] <sub>8</sub> <b>CCCGAA</b> ...                                             | FH, RGNJ      |

| Junction Type           | Sequence (5' to 3') <sup>A</sup>                                          | Isolate(s)             |
|-------------------------|---------------------------------------------------------------------------|------------------------|
| 24                      | ...(CCCTAA) <sub>3</sub> [ <b>CCCAAA</b> ] <sub>4</sub> <b>CCCGAA</b> ... | FH, RGNJ               |
| 25                      | ... CCCTAA[ <b>CCCAAA</b> ] <sub>6</sub> <b>CCCGAA</b> ...                | RGNJ, PL1-1            |
| 26                      | ...[ <b>CCCAAA</b> ] <sub>3</sub> <b>CCCGAA</b> ...                       | PL1-1, KS320           |
| M1/2 <sup>B</sup> to M1 |                                                                           |                        |
| 27                      | ... CCC(456)...                                                           | FH                     |
| 28                      | ... CCC(454)...                                                           | FH                     |
| 29                      | ...(CCCTAA) <sub>2</sub> CCC(454)...                                      | FH                     |
| M2 to M1                |                                                                           |                        |
| 30                      | ...(CCCTAA)G(791)...                                                      | LpKY97-1A, FH,<br>RGNJ |
| 31                      | ...(CCCTAA) <sub>3</sub> (369)...                                         | LpKY97-1A              |
| 32                      | ...(CCCTAA) <sub>3</sub> [ <b>CCCAAA</b> ] <sub>7</sub> <b>CCCGAA</b> ... | LpKY97-1A              |

<sup>A</sup> Variant repeats are shown in bold type. “...” prefixing each sequence represents the intact 3’ terminus of the distal MoTeR. The “...” suffix represents the proximal MoTeR sequences. If this suffix is preceded by a parenthetical number, this indicates that the proximal MoTeR is 5’ truncated and the number corresponds to the starting nucleotide position. MoTeR sequences are shown in bold type. Note, however, that it is not possible to say precisely where the telomere ends and the MoTeR starts.

<sup>B</sup> It was not possible to distinguish between the 5’ ends of M1 and M2
