# Supplementary material
Source: PubMed Central journal article supplement (PMC3374306)
Supplement: supp_111.137950_TableS9.pdf [file supp_111.137950_TableS9.pdf]

**Table S9** Telomeric distribution of MoTeR1 and MoTeR in several prg-infecting strains

| Isolate        | Distinct telomeric fragments <sup>A</sup> | MoTeR1 only <sup>B</sup> | MoTeR2 only <sup>B</sup> | MoTeR1 + MoTeR2 <sup>B</sup> | no MoTeR hybridization <sup>B</sup> |
|----------------|-------------------------------------------|--------------------------|--------------------------|------------------------------|-------------------------------------|
| PL1-1          | 11                                        | 1                        | 0                        | 7                            | 3                                   |
| PL2-1          | 9                                         | 1                        | 3                        | 4                            | 1                                   |
| PL3-1          | 13                                        | 13                       | 0                        | 0                            | 0                                   |
| CHW            | 10                                        | 3                        | 3                        | 4                            | 0                                   |
| CHRF           | 8                                         | 2                        | 2                        | 3                            | 1                                   |
| GG9            | 7                                         | 1                        | 2                        | 4                            | 0                                   |
| GG13           | 9                                         | 2                        | 1                        | 6                            | 0                                   |
| KS320          | 12                                        | 2                        | 3                        | 5                            | 2                                   |
| KS330          | 11                                        | 1                        | 3                        | 5                            | 2                                   |
| LpOH97-1       | 10                                        | 4                        | 2                        | 4                            | 0                                   |
| LpOH3          | 9                                         | 4                        | 2                        | 2                            | 1                                   |
| RGNJ           | 10                                        | 2                        | 2                        | 5                            | 1                                   |
| TFMS           | 12                                        | 5                        | 1                        | 4                            | 2                                   |
| TFRGA          | 5                                         | 1                        | 1                        | 3                            | 0                                   |
| <b>Average</b> | 10.5                                      | 3.2                      | 1.9                      | 4.3                          | 1                                   |

<sup>A</sup> Fragments showing good electrophoretic resolution and with a hybridization signal consistent with a single telomere.

<sup>B</sup> Values indicate the number of telomeres that contain the probe(s) indicated.
