# Supplementary material
Source: PubMed Central journal article supplement (PMC3374306)
Supplement: supp_111.137950_TableS10.pdf [file supp_111.137950_TableS10.pdf]

**Table S10** Copy numbers of MoTeR elements in *M. oryzae* isolates from perennial ryegrass.

| Isolate        | Band Counting |        |        | Densometric Scan |        |        |
|----------------|---------------|--------|--------|------------------|--------|--------|
|                | Telomere      | MoTeR1 | MoTeR2 | Telomere         | MoTeR1 | MoTeR2 |
| PL1-1          | 13            | 14     | 13     | 14.9             | 19.3   | 12.9   |
| PL2-1          | 14            | 14     | 12     | 15.0             | 22.4   | 13.0   |
| PL3-1          | 15            | 15     | 0      | 14.7             | 14.8   | 0      |
| CHW            | 10            | 10     | 9      | 9.6              | 10.5   | 9.1    |
| CHRF           | 14            | 14     | 15     | 13.9             | 27.4   | 22.9   |
| GG-9           | 12            | 7      | 11     | 14.8             | 10.0   | 13.4   |
| GG-13          | 13            | 11     | 11     | 12.9             | 15.6   | 10.1   |
| KS320          | 14            | 10     | 10     | 14.2             | 14.5   | 12.2   |
| KS330          | 14            | 12     | 13     | 13.9             | 12.3   | 19.0   |
| LpOH97-1       | 15            | 16     | 12     | 15.5             | 15.9   | 11.2   |
| LPOH97-3       | 14            | 16     | 5      | 13.8             | 15.5   | 6.0    |
| RGNJ           | 15            | 16     | 13     | 17.3             | 15.6   | 14.7   |
| TFMS           | 14            | 11     | 5      | 14.3             | 12.4   | 4.2    |
| TFRGA          | 9             | 8      | 10     | 15.3             | 11.0   | 9.6    |
| <b>average</b> | 13.3          | 12.4   | 9.9    | 14.3             | 15.5   | 11.3   |
